# Supplementary material for: Solution-processable and photopolymerisable TiO2 nanorods as dielectric layers for thin film transistors
Source: Royal Society of Chemistry journal article supplement (doi:10.1039/d0ra04445h), 2020-01-01
Supplement: d0ra04445h1.pdf [file d0ra04445h1.pdf]

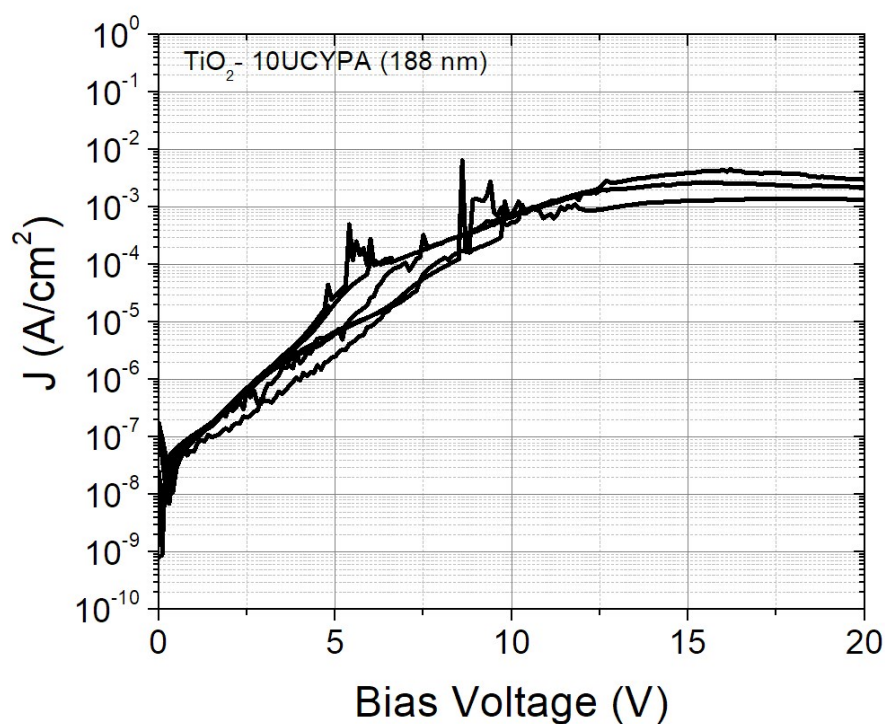

Figure 1. Leakage current through a 188 nm  $\text{TiO}_2$ -10UCYPA thin film measured in air. Measurements were done on 3-4 fresh (unstressed) devices.

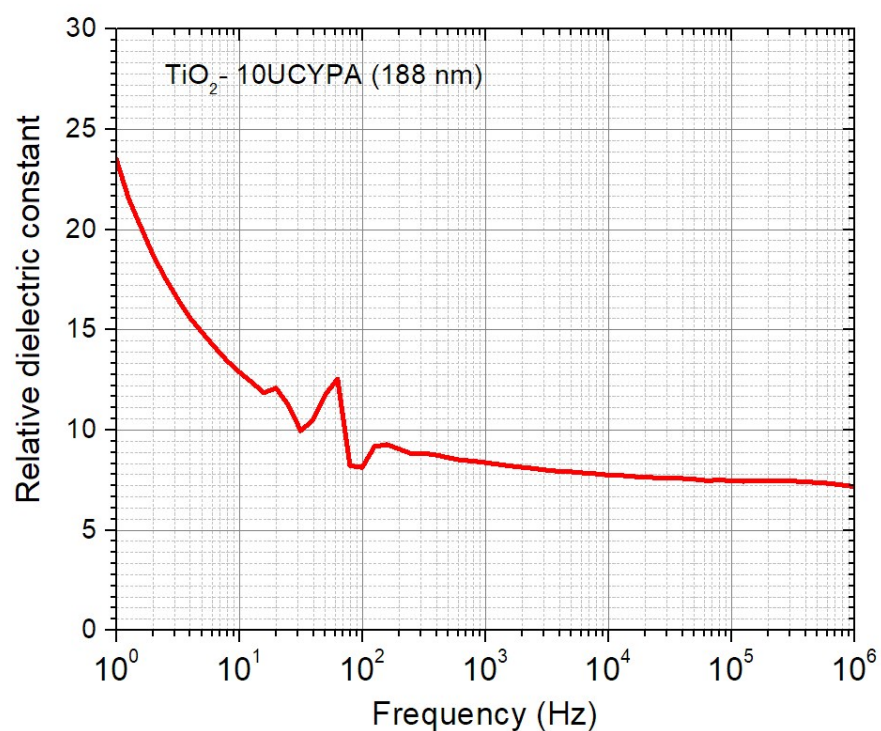

Figure 2. Relative dielectric constant of a 188 nm  $\text{TiO}_2$ -10UCYPA thin film measured in air. The noise at around 50Hz is originating from the power grid.

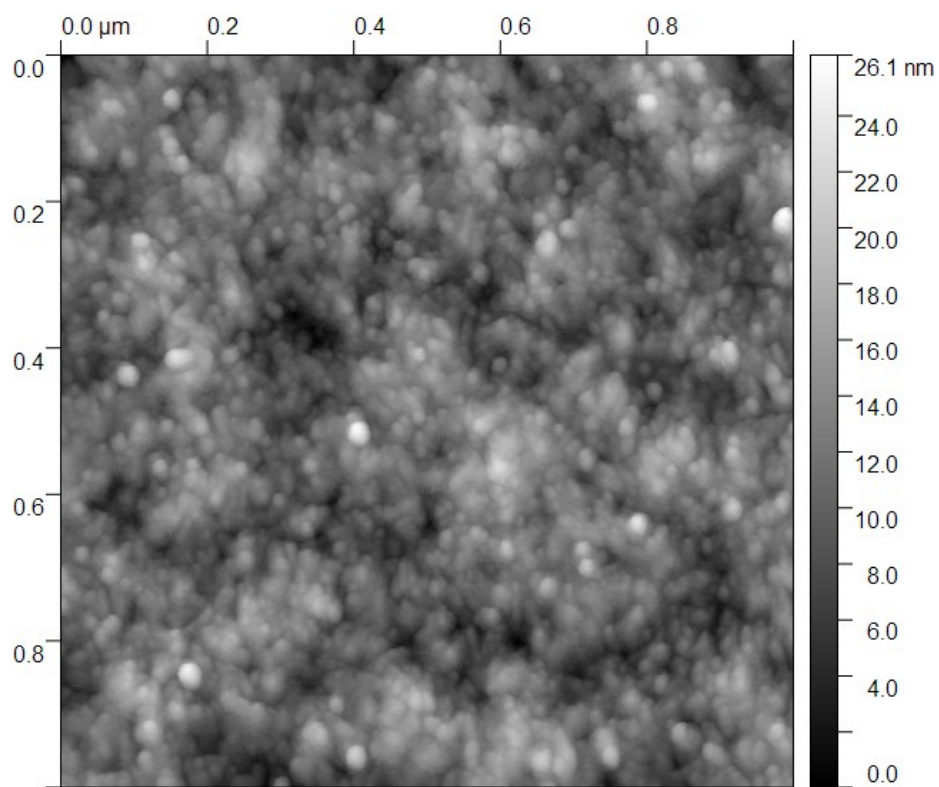

*Figure 3. AFM scan of a  $\text{TiO}_2$ -OA thin film*
